# Supplementary material for: Effect of soy isoflavone supplementation on blood pressure: a meta-analysis of randomized controlled trials
Source: Springer Nature journal article supplement (doi:10.1186/s12937-024-00932-6), 2024-03-07
Supplement: MOESM2 [file 26830258]

**Fig. S1A**

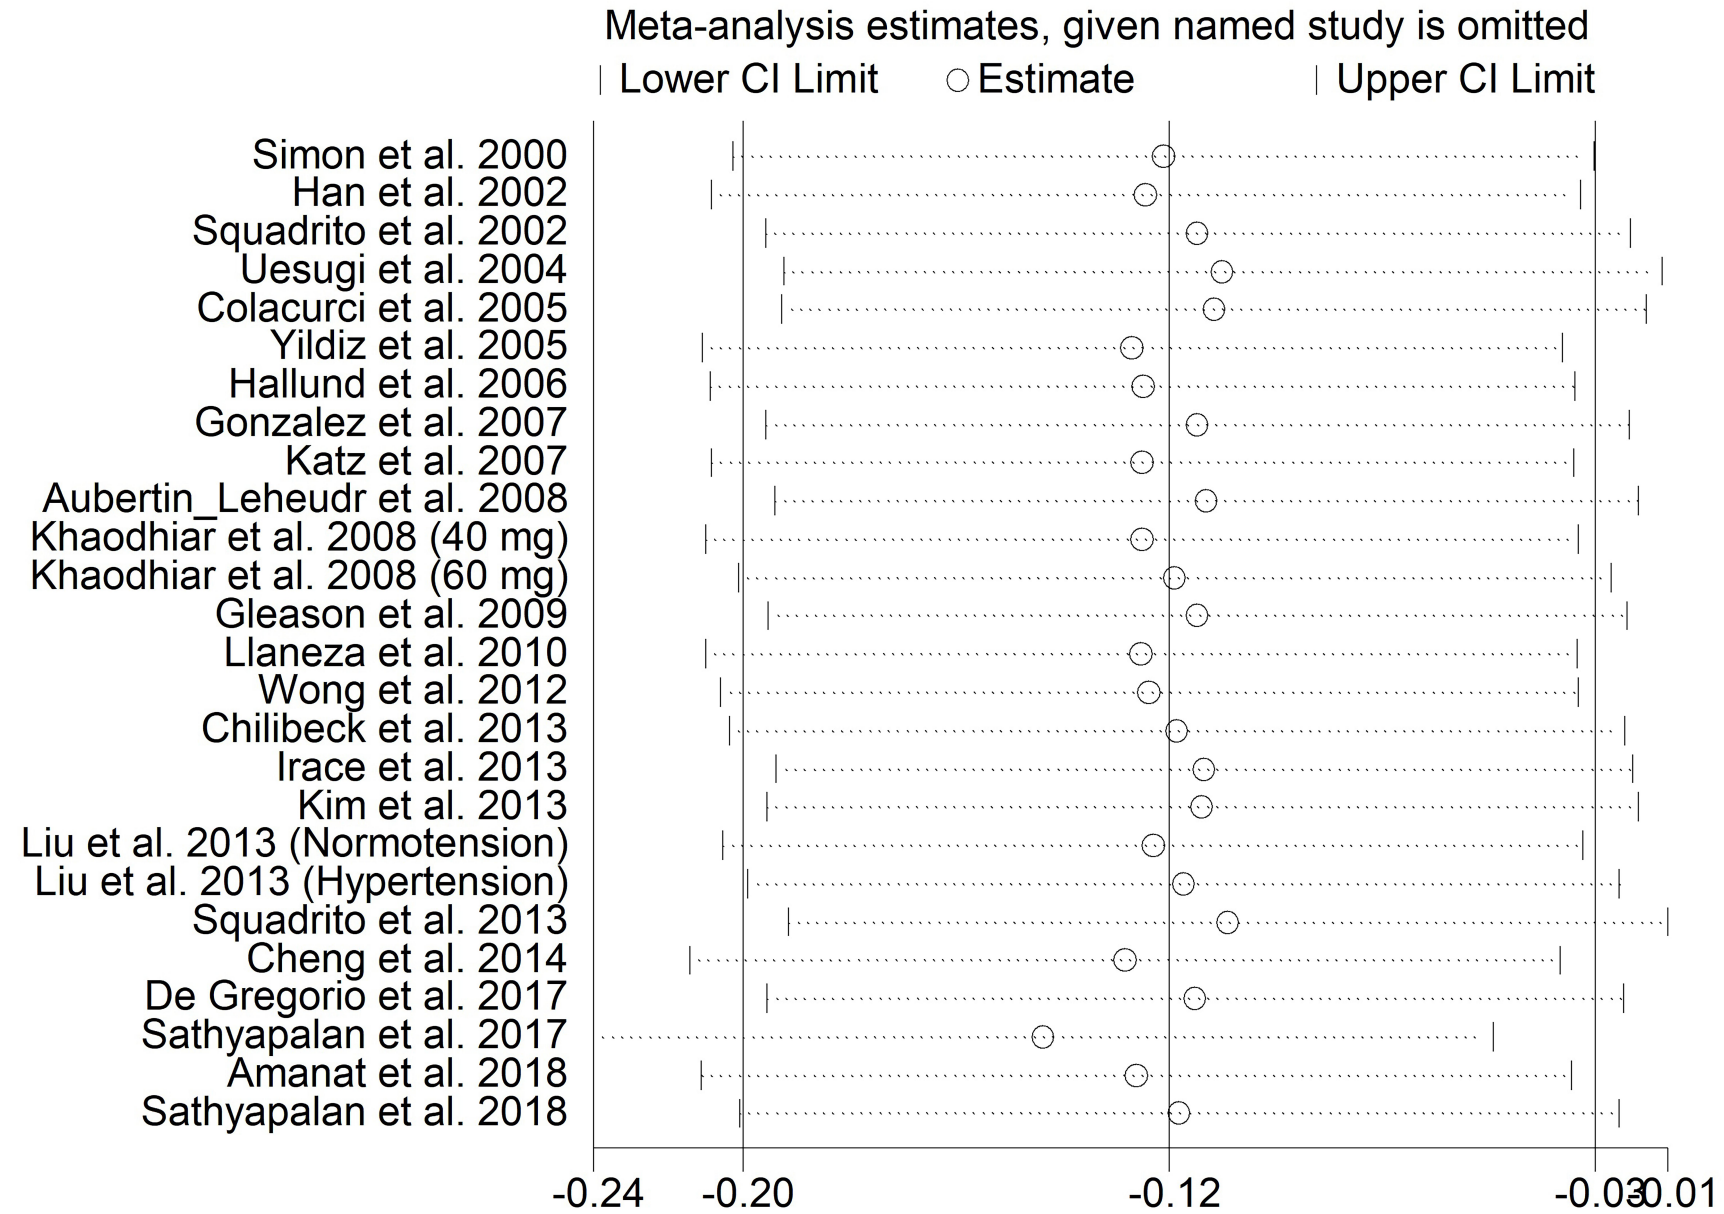

**Fig. S1B**

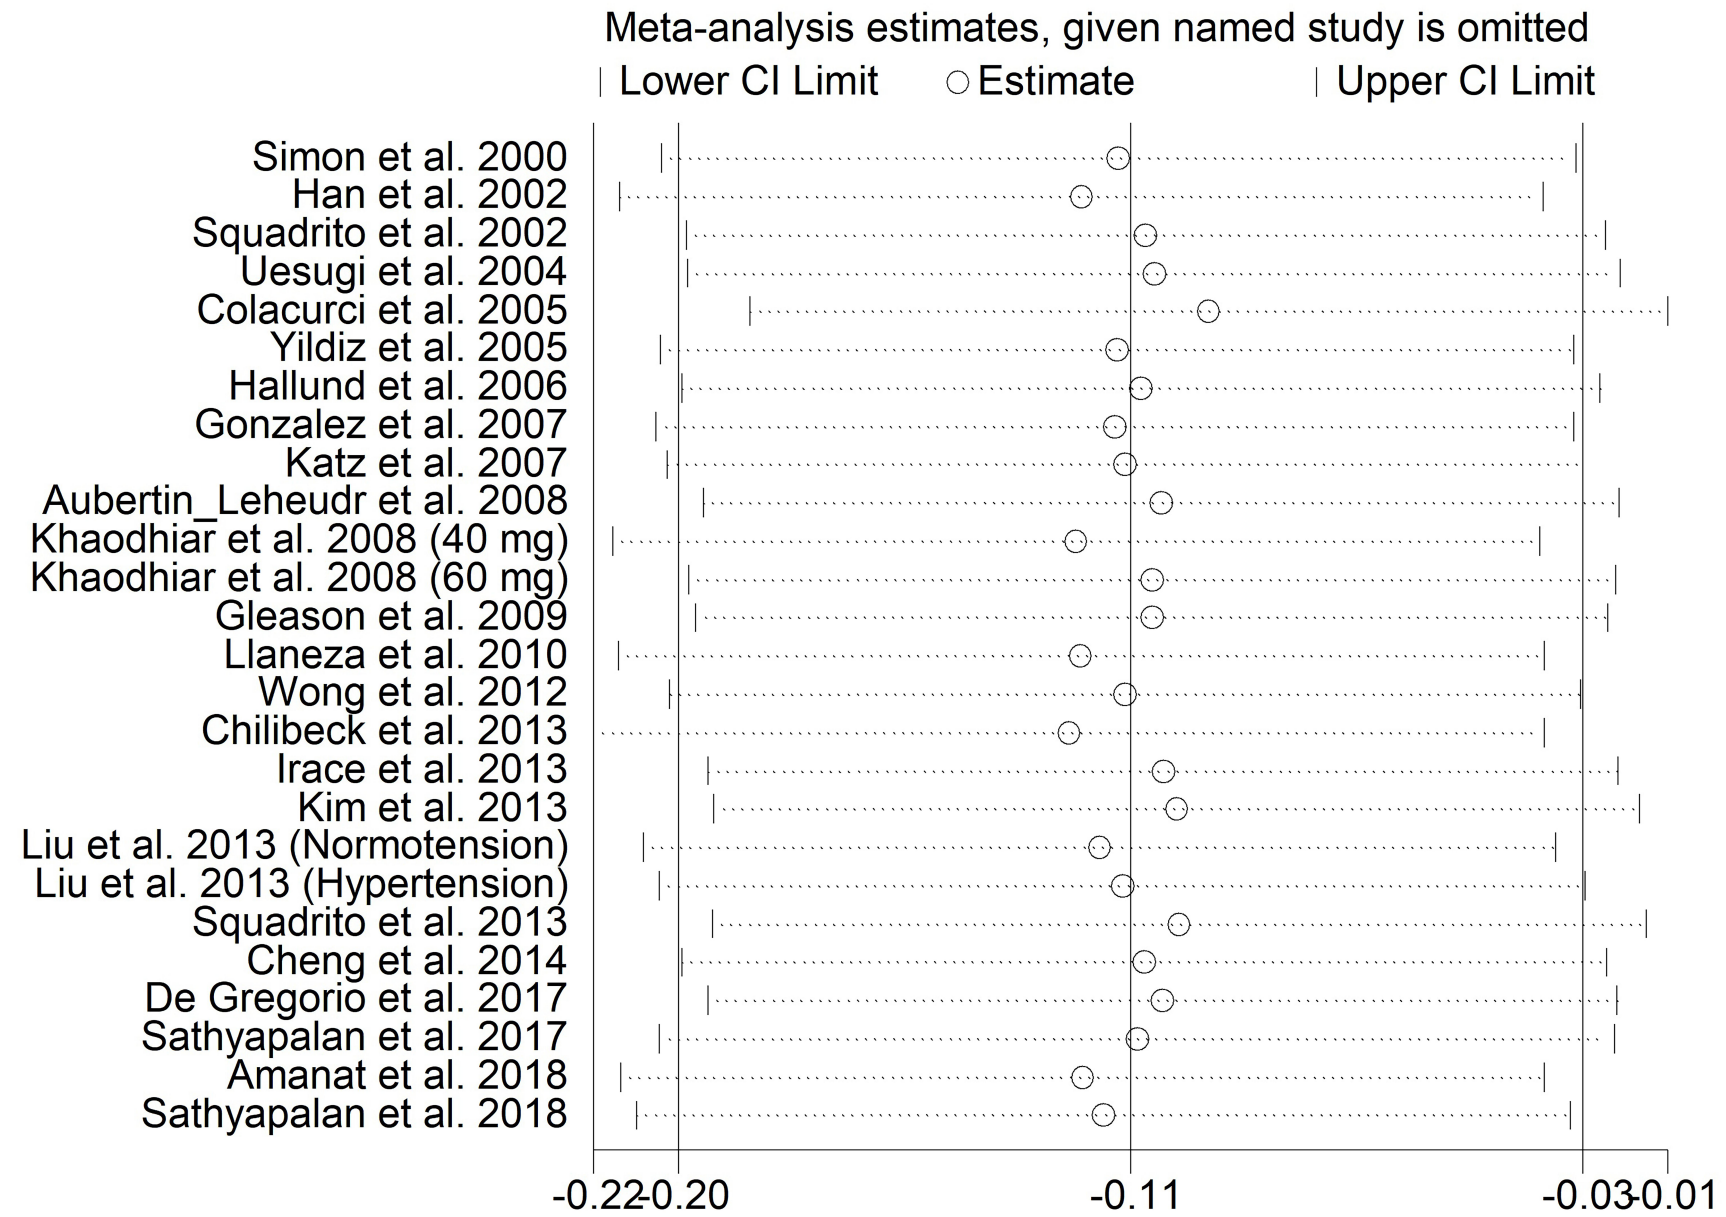

**Fig. S2A**

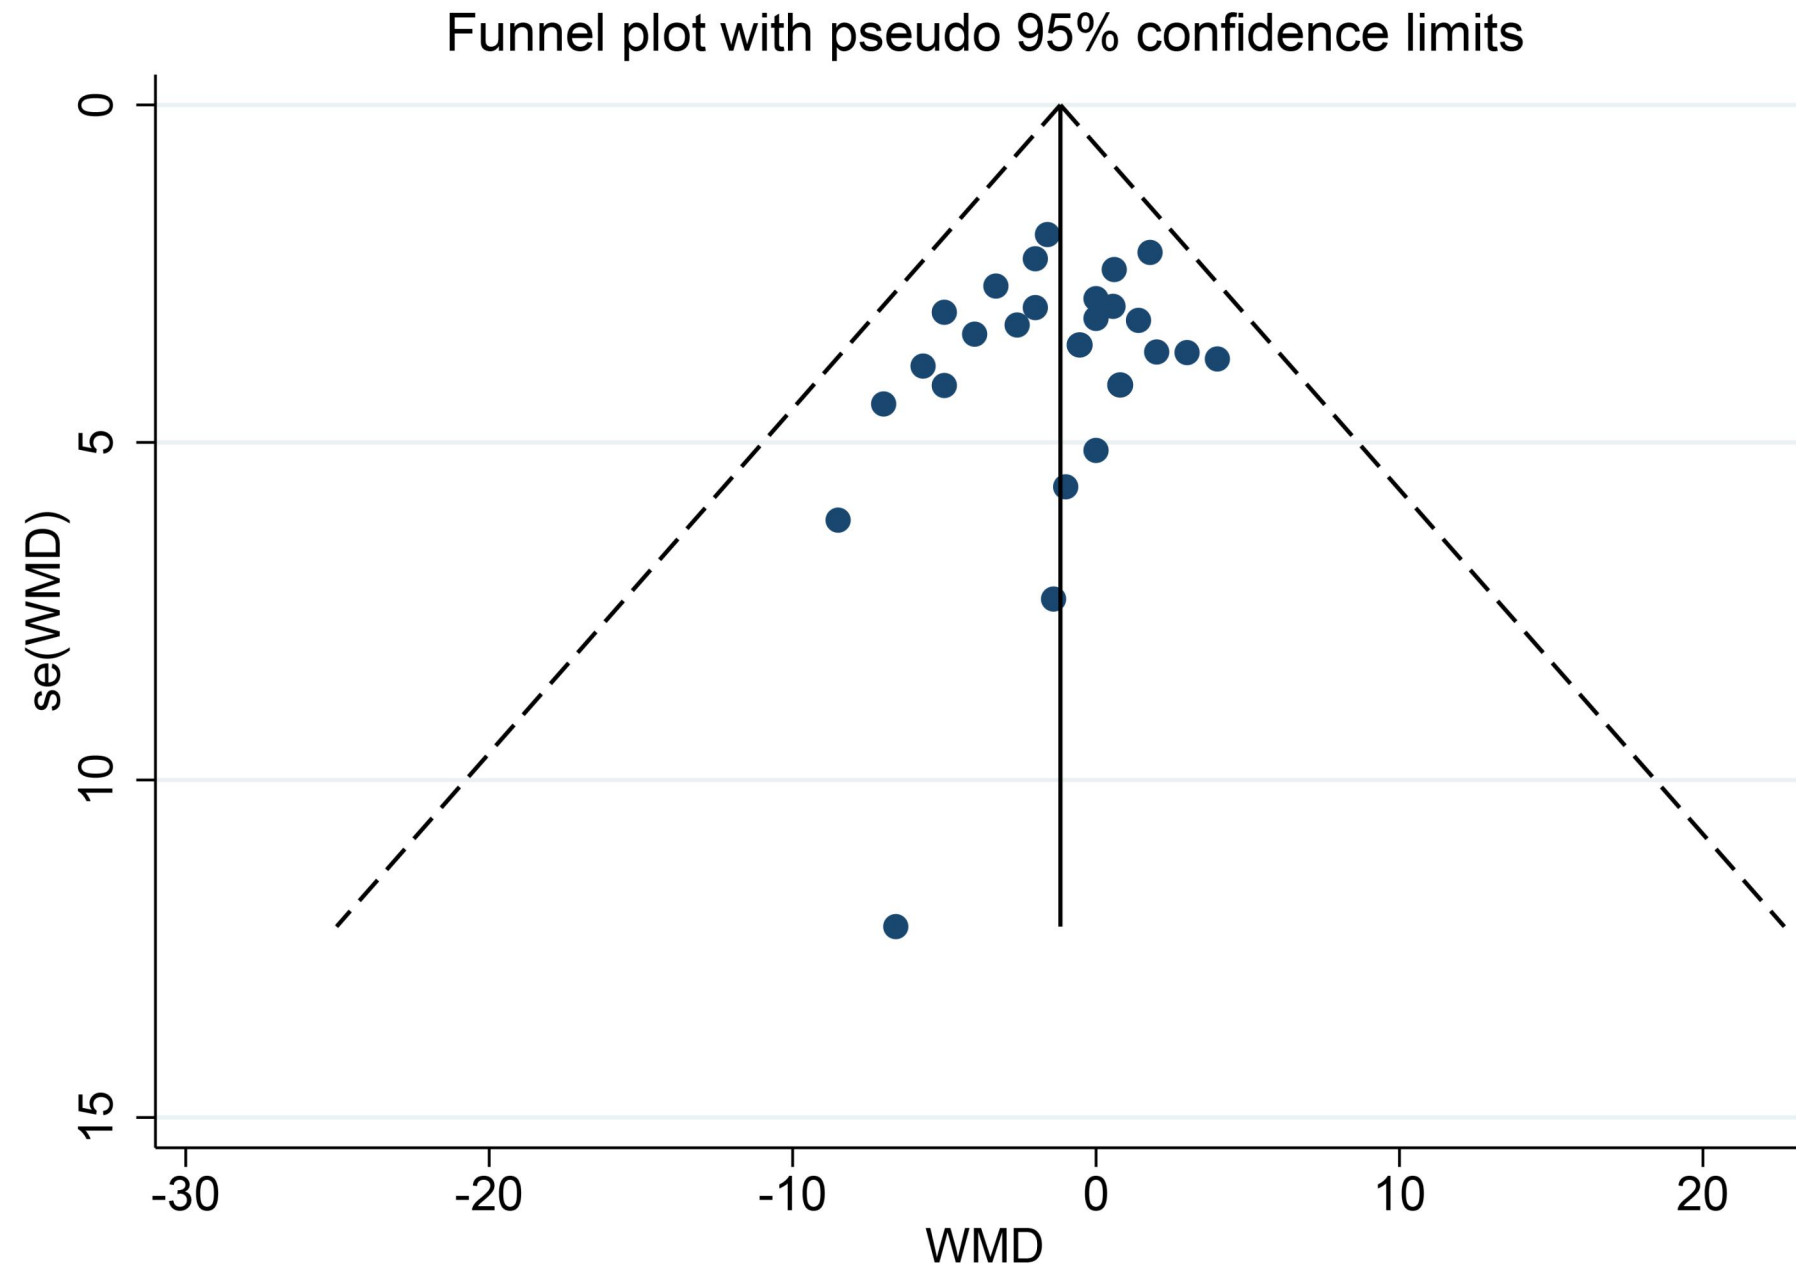

**Fig. S2B**

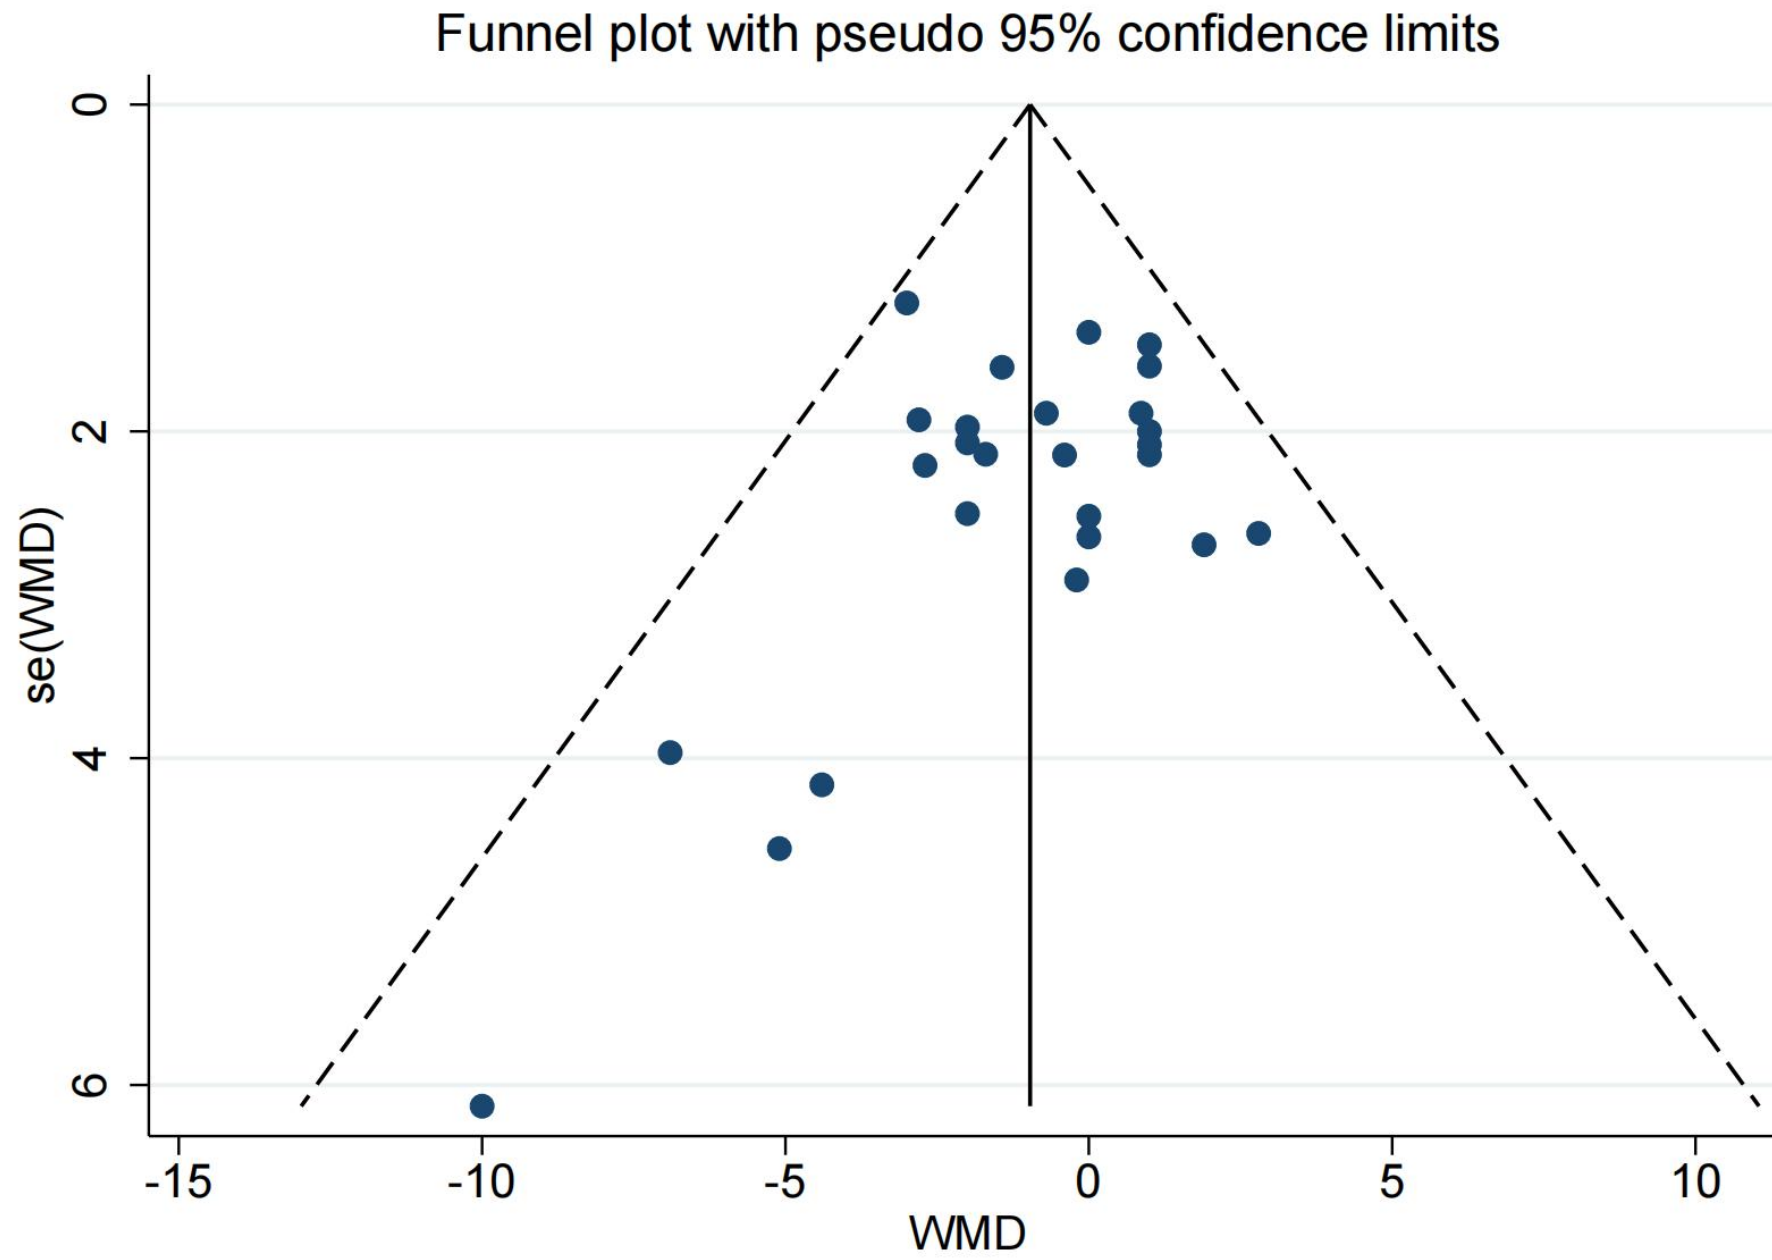

### **Supplemental Figure Legends**

**Fig. S1A** Sensitivity analyses for the effect of soy isoflavone supplementation on SBP.

Abbreviation: SBP, systolic blood pressure.

**Fig. S1B** Sensitivity analyses for the effect of soy isoflavone supplementation on

DBP. Abbreviation: DBP, diastolic blood pressure.

**Fig. S2A** Funnel plot for the effect of soy isoflavone supplementation on SBP.

Abbreviation: SBP, systolic blood pressure.

**Fig. S2B** Funnel plot for the effect of soy isoflavone supplementation on DBP.

Abbreviation: DBP, diastolic blood pressure.
